# Supplementary material
Source: publisher figshare collection journal article supplement (https://frontiersin.figshare.com/ndownloader/files/25618676)
Supplement: Supplementary file [file 25618676]

## Supplementary Material

### Inertial-Robotic Motion Tracking in End-Effector-based Rehabilitation Robots

**Table S1.** Parameter sensitivity of the estimated shoulder position errors (Euclidean distance) for a large disagreement between the assumed and the actual IMU-to-elbow distance  $\Delta p_E$ . Abbreviations: Proper movement (Prop.Mov.), Compensatory movement (Comp.Mov.), Distance (Dist.), Percentile (%ile).

| Subject | Type      | Original Error [cm]                     |             |             | Change of the Errors [cm]                    |               |              |
|---------|-----------|-----------------------------------------|-------------|-------------|----------------------------------------------|---------------|--------------|
|         |           | Dist. IMU to Elbow $\Delta p_E = 15$ cm |             |             | Changed to half value: $\Delta p_E = 7.5$ cm |               |              |
|         |           | Median                                  | 5th %ile    | 95th %ile   | Median                                       | 5th %ile      | 95th %ile    |
| S1      | Prop.Mov. | 4.19                                    | 1.94        | 8.25        | 0.12                                         | 0.01          | 0.17         |
|         | Comp.Mov. | 3.94                                    | 1.21        | 8.61        | 0.06                                         | 0.09          | -0.09        |
| S2      | Prop.Mov. | 2.81                                    | 0.80        | 5.23        | 0.09                                         | 0.00          | 0.14         |
|         | Comp.Mov. | 3.63                                    | 1.11        | 6.95        | 0.06                                         | -0.03         | 0.20         |
| S3      | Prop.Mov. | 4.98                                    | 1.00        | 9.75        | 0.14                                         | 0.06          | 0.31         |
|         | Comp.Mov. | 4.52                                    | 1.70        | 9.17        | -0.10                                        | -0.19         | 0.24         |
| S4      | Prop.Mov. | 3.79                                    | 1.35        | 6.59        | 0.10                                         | 0.00          | 0.11         |
|         | Comp.Mov. | 4.60                                    | 1.43        | 9.40        | -0.03                                        | -0.08         | -0.14        |
| S5      | Prop.Mov. | 3.37                                    | 1.28        | 6.70        | 0.04                                         | -0.01         | 0.13         |
|         | Comp.Mov. | 3.83                                    | 0.88        | 8.66        | 0.11                                         | 0.11          | 0.65         |
| Average |           | <b>3.97</b>                             | <b>1.27</b> | <b>7.93</b> | <b>0.06</b>                                  | <b>0.00</b>   | <b>0.17</b>  |
|         |           | Average relative change                 |             |             | <b>1.5 %</b>                                 | <b>-0.3 %</b> | <b>2.2 %</b> |

**Table S2.** Parameter sensitivity of the estimated elbow angle errors for a large disagreement between the assumed and the actual IMU-to-elbow distance  $A_{PE}$ . Abbreviations: Proper movement (Prop.Mov.), Compensatory movement (Comp.Mov.), Distance (Dist.), Percentile (%ile).

| Subject        | Type      | Original Error [°]                  |             |             | Change of the Errors [°]                 |               |              |
|----------------|-----------|-------------------------------------|-------------|-------------|------------------------------------------|---------------|--------------|
|                |           | Dist. IMU to Elbow $A_{PE} = 15$ cm |             |             | Changed to half value: $A_{PE} = 7.5$ cm |               |              |
|                |           | Median                              | 5th %ile    | 95th %ile   | Median                                   | 5th %ile      | 95th %ile    |
| S1             | Prop.Mov. | 1.79                                | 0.17        | 5.79        | 0.05                                     | 0.00          | -0.01        |
|                | Comp.Mov. | 4.01                                | 0.41        | 9.23        | -0.28                                    | -0.01         | -0.47        |
| S2             | Prop.Mov. | 2.31                                | 0.21        | 6.43        | 0.13                                     | 0.00          | 0.12         |
|                | Comp.Mov. | 3.90                                | 0.34        | 9.22        | 0.19                                     | 0.03          | 0.62         |
| S3             | Prop.Mov. | 3.12                                | 0.33        | 8.42        | 0.38                                     | 0.02          | 1.04         |
|                | Comp.Mov. | 3.38                                | 0.24        | 10.13       | 0.00                                     | 0.12          | -0.75        |
| S4             | Prop.Mov. | 2.50                                | 0.27        | 6.53        | 0.25                                     | 0.02          | 0.95         |
|                | Comp.Mov. | 2.95                                | 0.24        | 8.41        | 0.14                                     | 0.12          | 0.24         |
| S5             | Prop.Mov. | 2.19                                | 0.22        | 5.94        | 0.13                                     | -0.01         | 0.37         |
|                | Comp.Mov. | 3.67                                | 0.27        | 11.37       | 1.14                                     | 0.37          | 1.94         |
| <b>Average</b> |           | <b>2.98</b>                         | <b>0.27</b> | <b>8.15</b> | <b>0.21</b>                              | <b>0.07</b>   | <b>0.41</b>  |
|                |           | <b>Average relative change</b>      |             |             | <b>7.1 %</b>                             | <b>24.4 %</b> | <b>5.0 %</b> |

**Table S3.** Parameter sensitivity of the estimated shoulder position errors (Euclidean distance) for typical to-be-expected variations ( $\pm 2.5$  cm) in the manually measured upper arm length  $l_A$ . Abbreviations: Proper movement (Prop.Mov.), Compensatory movement (Comp.Mov.), Percentile (%ile).

| Subject | Type      | Original Error [cm]               |             |             |  | Change of the Errors [cm] |               |              |                         |               |               |
|---------|-----------|-----------------------------------|-------------|-------------|--|---------------------------|---------------|--------------|-------------------------|---------------|---------------|
|         |           | Upper arm length $l_A$ : measured |             |             |  | Changed: $l_A + 2.5$ cm   |               |              | Changed: $l_A - 2.5$ cm |               |               |
|         |           | Median                            | 5th %ile    | 95th %ile   |  | Median                    | 5th %ile      | 95th %ile    | Median                  | 5th %ile      | 95th %ile     |
| S1      | Prop.Mov. | 4.19                              | 1.94        | 8.25        |  | -0.01                     | 0.04          | 0.75         | 0.18                    | -0.13         | -0.61         |
|         | Comp.Mov. | 3.94                              | 1.21        | 8.61        |  | -0.04                     | -0.26         | 0.85         | 0.19                    | 0.35          | -0.65         |
| S2      | Prop.Mov. | 2.81                              | 0.80        | 5.23        |  | 0.06                      | -0.07         | 0.35         | 0.07                    | 0.09          | 0.17          |
|         | Comp.Mov. | 3.63                              | 1.11        | 6.95        |  | -0.01                     | -0.06         | 0.13         | 0.02                    | 0.11          | -0.06         |
| S3      | Prop.Mov. | 4.98                              | 1.00        | 9.75        |  | 0.38                      | 0.10          | 0.95         | -0.21                   | -0.03         | -0.72         |
|         | Comp.Mov. | 4.52                              | 1.70        | 9.17        |  | -0.07                     | -0.46         | 0.78         | 0.18                    | 0.54          | -0.46         |
| S4      | Prop.Mov. | 3.79                              | 1.35        | 6.59        |  | 0.15                      | -0.06         | 0.60         | -0.05                   | 0.23          | -0.21         |
|         | Comp.Mov. | 4.60                              | 1.43        | 9.40        |  | -0.01                     | -0.07         | -0.12        | 0.10                    | 0.20          | 0.17          |
| S5      | Prop.Mov. | 3.37                              | 1.28        | 6.70        |  | 0.12                      | -0.13         | 0.77         | 0.05                    | 0.13          | -0.60         |
|         | Comp.Mov. | 3.83                              | 0.88        | 8.66        |  | -0.05                     | 0.15          | 0.72         | 0.15                    | 0.22          | -0.65         |
| Average |           | <b>3.97</b>                       | <b>1.27</b> | <b>7.93</b> |  | <b>0.05</b>               | <b>-0.08</b>  | <b>0.58</b>  | <b>0.07</b>             | <b>0.17</b>   | <b>-0.36</b>  |
|         |           | Average relative change           |             |             |  | <b>1.3 %</b>              | <b>-6.5 %</b> | <b>7.3 %</b> | <b>1.7 %</b>            | <b>13.5 %</b> | <b>-4.6 %</b> |

**Table S4.** Parameter sensitivity of the estimated shoulder position errors (Euclidean distance) for variations of the cutoff frequency of the Butterworth filter for the determination of the time derivative  ${}_A\dot{\omega}_A$ . Abbreviations: Proper movement (Prop.Mov.), Compensatory movement (Comp.Mov.), Percentile (%ile).

| Subject | Type      | Original Error [cm]       |             |             |           | Change of the Errors [cm]       |               |              |                                 |              |              |
|---------|-----------|---------------------------|-------------|-------------|-----------|---------------------------------|---------------|--------------|---------------------------------|--------------|--------------|
|         |           | Cutoff frequency = 2.5 Hz |             |             |           | Changed: Cutoff frequency +1 Hz |               |              | Changed: Cutoff frequency -1 Hz |              |              |
|         |           | Median                    | 5th %ile    | 95th %ile   | 95th %ile | Median                          | 5th %ile      | 95th %ile    | Median                          | 5th %ile     | 95th %ile    |
| S1      | Prop.Mov. | 4.19                      | 1.94        | 8.25        |           | 0.00                            | 0.00          | 0.00         | -0.01                           | 0.00         | 0.00         |
|         | Comp.Mov. | 3.94                      | 1.21        | 8.61        |           | 0.00                            | 0.00          | 0.00         | 0.00                            | 0.00         | 0.01         |
| S2      | Prop.Mov. | 2.81                      | 0.80        | 5.23        |           | 0.00                            | 0.00          | 0.00         | 0.00                            | 0.00         | 0.00         |
|         | Comp.Mov. | 3.63                      | 1.11        | 6.95        |           | 0.00                            | 0.00          | 0.00         | 0.00                            | 0.00         | 0.00         |
| S3      | Prop.Mov. | 4.98                      | 1.00        | 9.75        |           | 0.01                            | -0.01         | 0.01         | 0.00                            | 0.00         | 0.00         |
|         | Comp.Mov. | 4.52                      | 1.70        | 9.17        |           | 0.00                            | 0.00          | 0.01         | 0.00                            | 0.00         | 0.00         |
| S4      | Prop.Mov. | 3.79                      | 1.35        | 6.59        |           | 0.00                            | 0.00          | 0.00         | 0.00                            | 0.00         | 0.00         |
|         | Comp.Mov. | 4.60                      | 1.43        | 9.40        |           | 0.00                            | 0.00          | 0.00         | 0.00                            | 0.00         | 0.00         |
| S5      | Prop.Mov. | 3.37                      | 1.28        | 6.70        |           | 0.00                            | 0.00          | 0.00         | 0.00                            | 0.00         | 0.00         |
|         | Comp.Mov. | 3.83                      | 0.88        | 8.66        |           | 0.00                            | 0.00          | 0.00         | -0.08                           | 0.00         | 0.00         |
| Average |           | <b>3.97</b>               | <b>1.27</b> | <b>7.93</b> |           | <b>0.00</b>                     | <b>0.00</b>   | <b>0.00</b>  | <b>-0.01</b>                    | <b>0.00</b>  | <b>0.00</b>  |
|         |           | Average relative change   |             |             |           | <b>0.0 %</b>                    | <b>-0.1 %</b> | <b>0.0 %</b> | <b>-0.2 %</b>                   | <b>0.0 %</b> | <b>0.0 %</b> |

**Table S5.** Parameter sensitivity of the estimated elbow angle errors for variations of the cutoff frequency of the Butterworth filter for the determination of the time derivative  $\dot{\omega}_A$ . Abbreviations: Proper movement (Prop.Mov.), Compensatory movement (Comp.Mov.), Percentile (%ile).

| Subject        | Type      | Original Error [°]             |             |             |           | Change of the Errors [°]        |               |              |                                 |               |              |
|----------------|-----------|--------------------------------|-------------|-------------|-----------|---------------------------------|---------------|--------------|---------------------------------|---------------|--------------|
|                |           | Cutoff frequency = 2.5 Hz      |             |             |           | Changed: Cutoff frequency +1 Hz |               |              | Changed: Cutoff frequency -1 Hz |               |              |
|                |           | Median                         | 5th %ile    | 95th %ile   | 95th %ile | Median                          | 5th %ile      | 95th %ile    | Median                          | 5th %ile      | 95th %ile    |
| S1             | Prop.Mov. | 1.79                           | 0.17        | 5.79        |           | 0.00                            | 0.00          | 0.00         | 0.00                            | 0.00          | -0.02        |
|                | Comp.Mov. | 4.01                           | 0.41        | 9.23        |           | 0.00                            | 0.00          | 0.00         | 0.01                            | 0.01          | 0.02         |
| S2             | Prop.Mov. | 2.31                           | 0.21        | 6.43        |           | 0.00                            | 0.00          | 0.00         | 0.00                            | 0.00          | 0.00         |
|                | Comp.Mov. | 3.90                           | 0.34        | 9.22        |           | 0.00                            | 0.00          | 0.00         | 0.00                            | 0.00          | 0.00         |
| S3             | Prop.Mov. | 3.12                           | 0.33        | 8.42        |           | -0.01                           | -0.01         | 0.01         | 0.00                            | 0.00          | 0.00         |
|                | Comp.Mov. | 3.38                           | 0.24        | 10.13       |           | 0.01                            | 0.00          | 0.02         | 0.00                            | 0.00          | 0.00         |
| S4             | Prop.Mov. | 2.50                           | 0.27        | 6.53        |           | 0.00                            | 0.00          | 0.00         | 0.00                            | 0.00          | 0.00         |
|                | Comp.Mov. | 2.95                           | 0.24        | 8.41        |           | 0.00                            | 0.00          | 0.00         | 0.00                            | 0.00          | 0.00         |
| S5             | Prop.Mov. | 2.19                           | 0.22        | 5.94        |           | 0.00                            | 0.00          | 0.00         | 0.00                            | 0.00          | 0.00         |
|                | Comp.Mov. | 3.67                           | 0.27        | 11.37       |           | 0.00                            | 0.00          | 0.00         | -0.03                           | -0.02         | 0.00         |
| <b>Average</b> |           | <b>2.98</b>                    | <b>0.27</b> | <b>8.15</b> |           | <b>0.00</b>                     | <b>0.00</b>   | <b>0.00</b>  | <b>0.00</b>                     | <b>0.00</b>   | <b>0.00</b>  |
|                |           | <b>Average relative change</b> |             |             |           | <b>0.0 %</b>                    | <b>-0.4 %</b> | <b>0.0 %</b> | <b>-0.1 %</b>                   | <b>-0.4 %</b> | <b>0.0 %</b> |
